# Supplementary material
Source: Springer Nature journal article supplement (https://www.springermedizin.de/resource/supplementary/12911_2013_890_MOESM3_ESM.pdf/9526792)
Supplement: MOESM3 [file 9526792]

False Links  
%

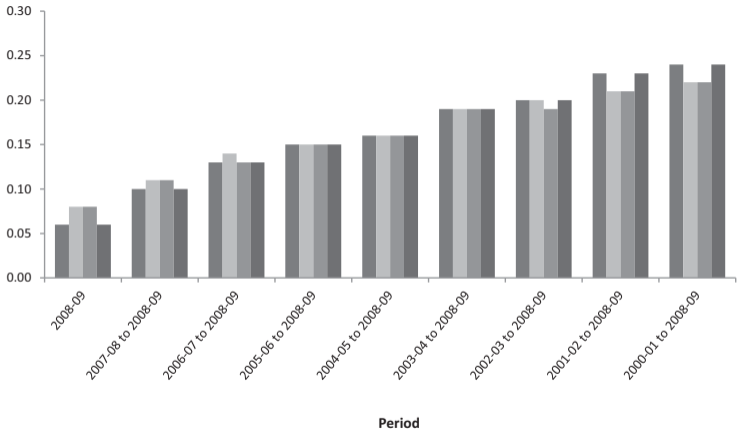

■ Basic SLK Strategy

■ Most Recent SLK Strategy

■ Most Frequent SLK Strategy

■ Any Match SLK Strategy
